# Supplementary material
Source: PubMed Central journal article supplement (PMC6715389)
Supplement: jci-129-125916-s193.pdf [file jci-129-125916-s193.pdf]

Supplemental Figure 1

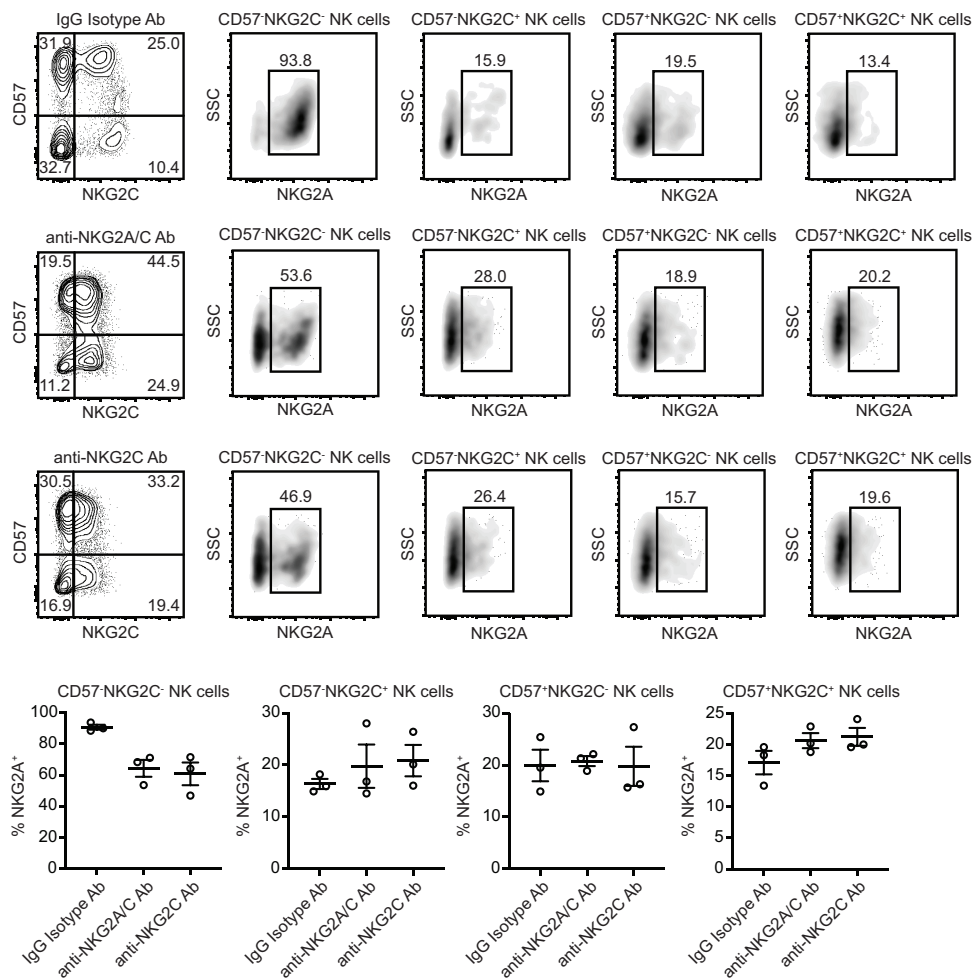

**Supplemental Figure 1. NKG2A is induced at similar frequencies on NKG2C<sup>+</sup> NK cells stimulated with anti-NKG2A/C and anti-NKG2C antibodies.** CD3/CD19-depleted PBMCs from HCMV seropositive donors were cultured for 7 days with 10 ng/ml IL-15 and IgG2b isotype Ab, anti-NKG2A/C Ab or anti-NKG2C Ab. Shown are FACS plots from a representative donor and summary data ( $n = 3$ ) of the frequencies of CD3<sup>+</sup>CD56<sup>+</sup> NK cells gated by CD57 and NKG2C that expressed NKG2A before and after culture. Results are from 2 independent experiments. Paired  $t$  tests were used; no significant results.

Supplemental Figure 2

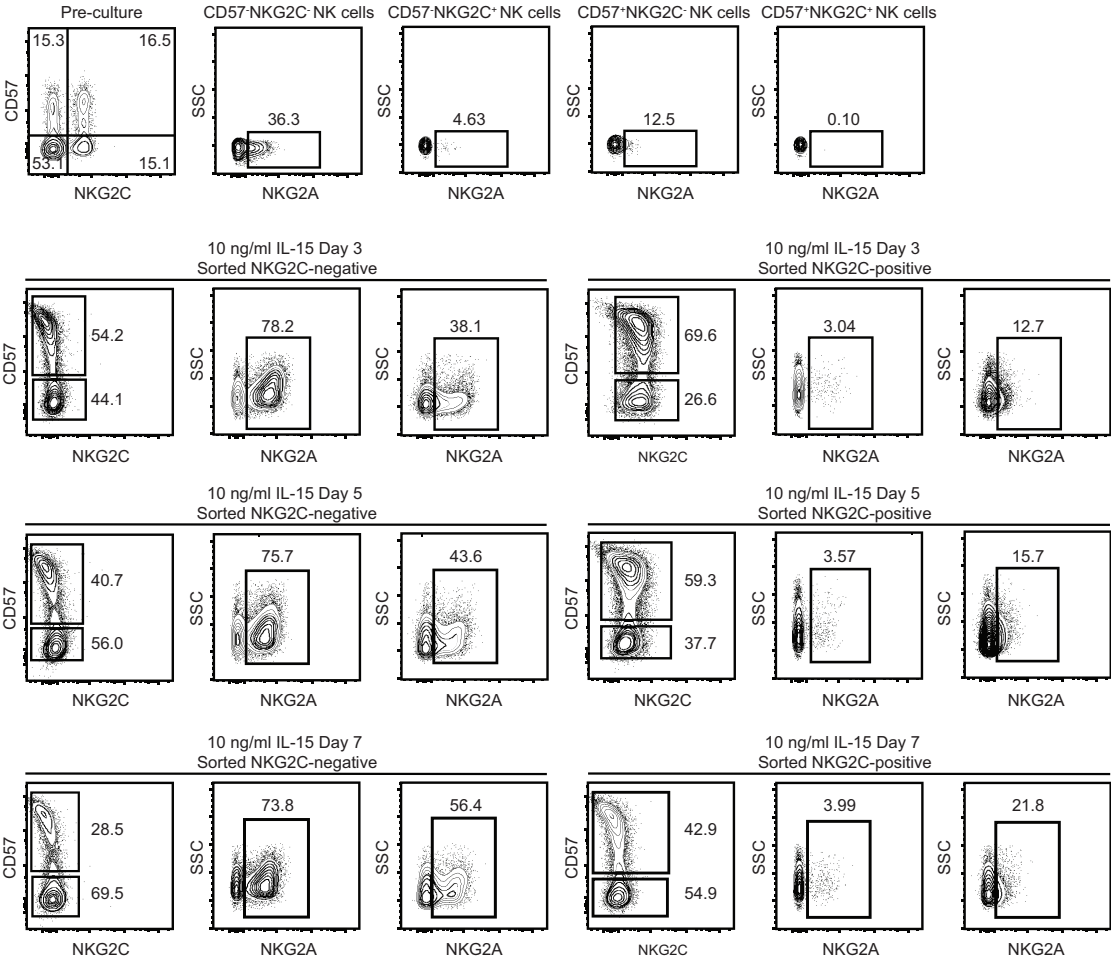

**Supplemental Figure 2. NKG2A is upregulated over time on sorted NKG2C<sup>-</sup> and NKG2C<sup>+</sup> NK cells cultured with IL-15.** CD3<sup>-</sup>CD56<sup>dim</sup>NKG2C<sup>-</sup> and CD3<sup>-</sup>CD56<sup>dim</sup>NKG2C<sup>+</sup> NK cells were sorted from the peripheral blood of 2 HCMV seropositive donors and cultured for 7 days with 10 ng/ml IL-15. Shown are FACS plots of NKG2A expression on NK cell subsets pre-culture and after 3, 5 and 7 days of culture from one of the donors. The second donor showed a similar trend in NKG2A expression pre- and post-culture. Each donor was sorted and cultured in an independent experiment.

Supplemental Figure 3

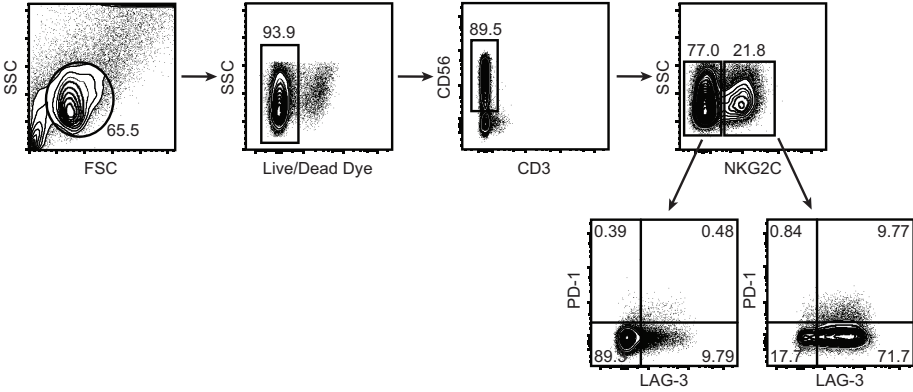

**Supplemental Figure 3. Gating strategy for FACS analysis of NK cells.** Shown is a representative example of a full gating path for flow cytometry analysis of NK cells from a 7-day culture with 10 ng/ml IL-15 and anti-NKG2A/C Ab.

Supplemental Figure 4

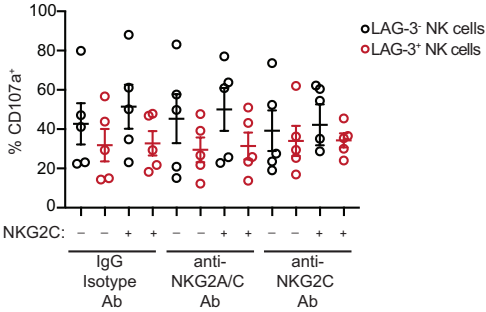

**Supplemental Figure 4. Chronically stimulated adaptive NK cells expressing LAG-3 do not exhibit impaired degranulation in response to K562 targets.** CD3/CD19-depleted PBMCs from HCMV seropositive donors were cultured for 7 days with 10 ng/ml IL-15 and IgG2b isotype Ab, anti-NKG2A/C Ab or anti-NKG2C Ab. NK cells post-culture were used as effectors in functional assays with K562 targets at an E:T ratio of 2:1. Shown is summary data of surface CD107a frequencies by NK cell subsets stratified by NKG2C and LAG-3 expression ( $n = 5$ ). Results are from 3 independent experiments. Paired  $t$  tests were used to compare LAG-3<sup>-</sup> and LAG-3<sup>+</sup> NK cells; no significant results.



Supplemental Figure 5

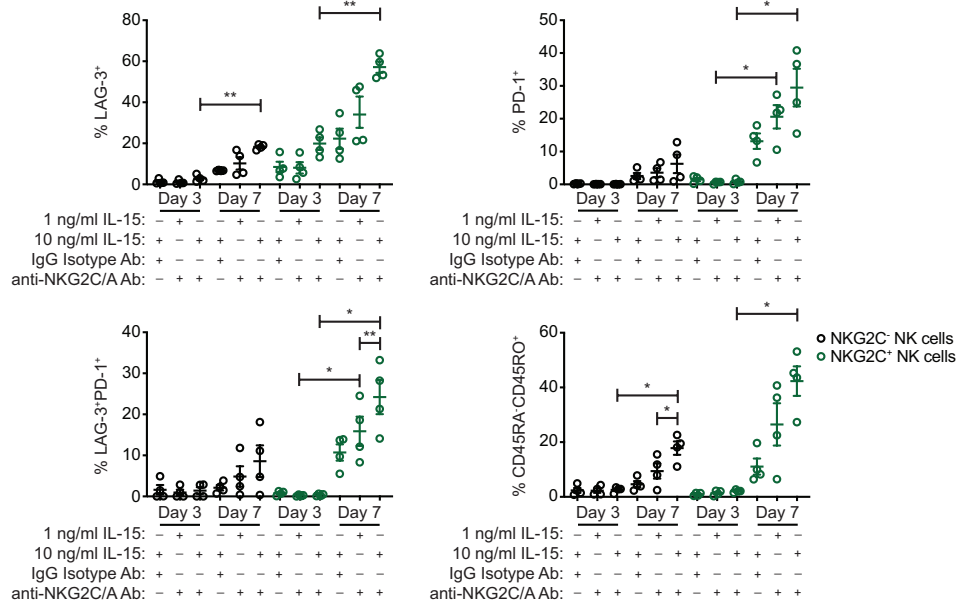

**Supplemental Figure 5. Upregulation of the checkpoint inhibitory receptors and CD45 isoform switching is influenced by IL-15 concentration and increases over time in culture.**

CD3/CD19-depleted PBMCs from HCMV seropositive donors were cultured for either 3 or 7 days with the indicated concentrations of IL-15 and plate-bound Ab. Shown are the percentages of CD3<sup>+</sup>CD56<sup>+</sup>NKG2C<sup>-</sup> and CD3<sup>+</sup>CD56<sup>+</sup>NKG2C<sup>+</sup> NK cells from each culture expressing LAG-3, PD-1 and CD45RO ( $n = 4$ ). Results are from 2 independent experiments. Paired  $t$  tests were used, and  $p$ -values of multiple group comparisons (within the NKG2C<sup>-</sup> NK cells groups and within the NKG2C<sup>+</sup> NK cells groups) were adjusted using the method of Hommel. \* $p \leq 0.05$ , \*\* $p \leq 0.01$

Supplemental Figure 6

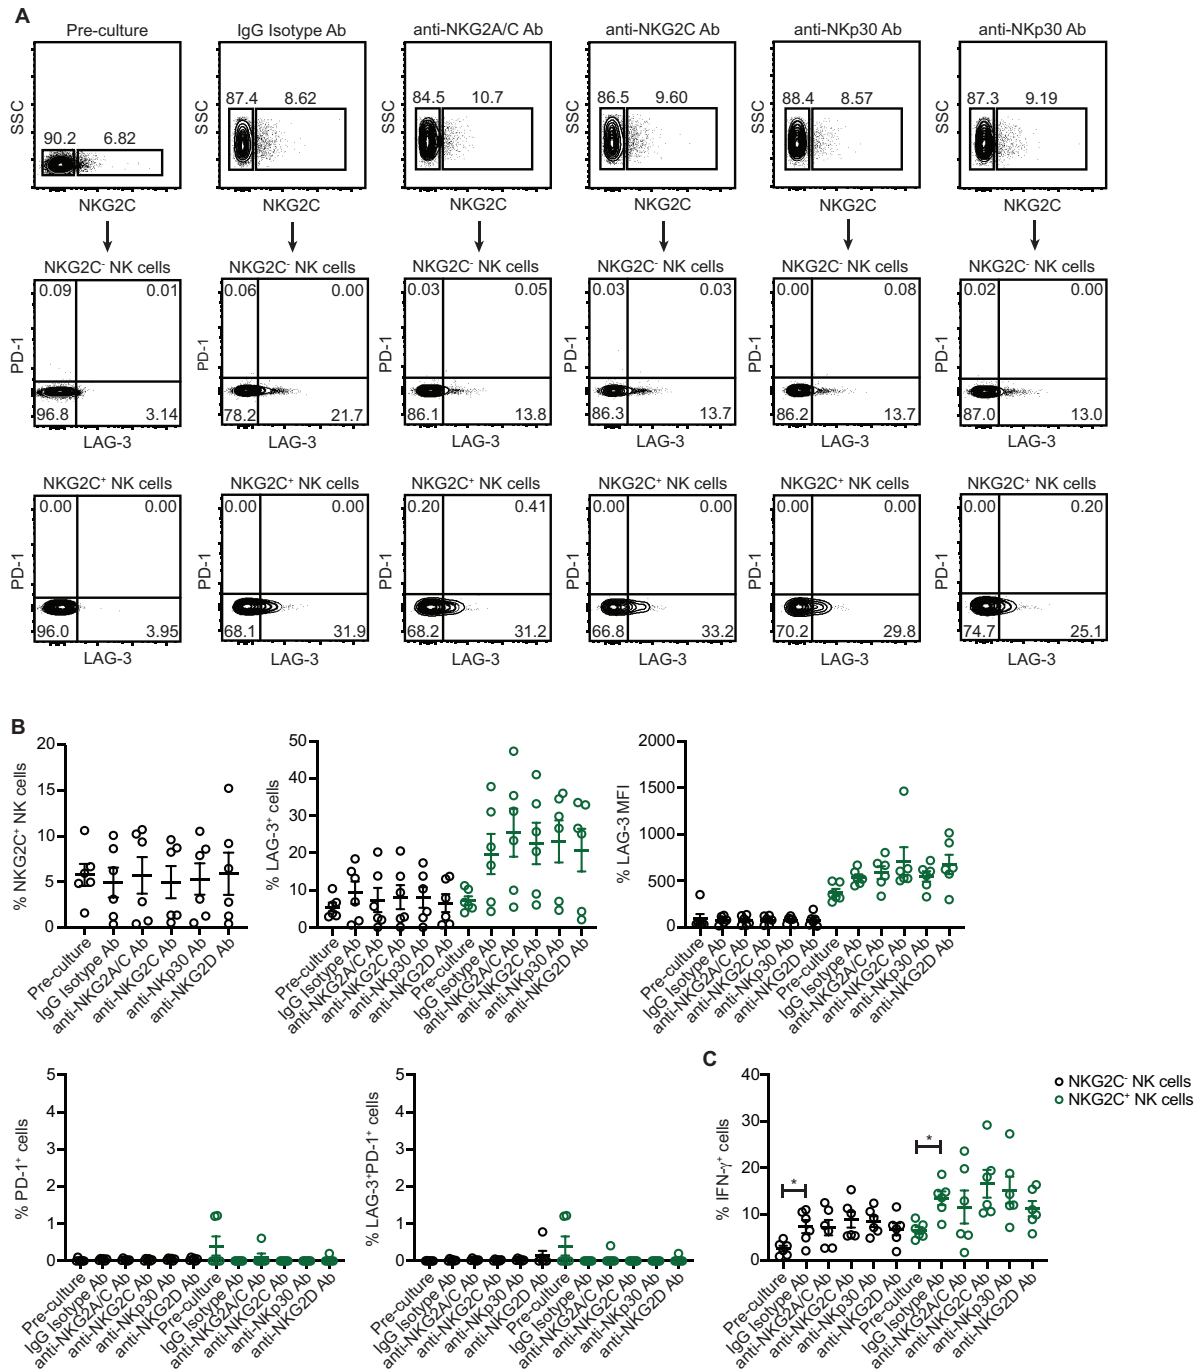

Merino et al.

**Supplemental Figure 6. Agonist antibody stimulation does not expand NKG2C<sup>+</sup> NK cells from HCMV seronegative donors and does not induce functional exhaustion.** CD3/CD19-depleted PBMCs from HCMV seronegative donors were cultured for 7 days with 10 ng/ml IL-15 and IgG2b isotype Ab, anti-NKG2A/C Ab, anti-NKG2C Ab, anti-NKp30 Ab or anti-NKG2D Ab. Shown are (A) FACS plots from a representative donor and (B) summary data ( $n = 6$ ) of the frequencies of CD3<sup>-</sup>CD56<sup>+</sup>NKG2C<sup>+</sup> NK cells and LAG-3 vs. PD-1 expression in the CD3<sup>-</sup>CD56<sup>+</sup>NKG2C<sup>-</sup> and CD3<sup>-</sup>CD56<sup>+</sup>NKG2C<sup>+</sup> subsets. (C) Pre- and post-culture NK cells were stimulated with K562 target cells at an E:T ratio of 2:1, and IFN- $\gamma$  production in CD3<sup>-</sup>CD56<sup>+</sup>NKG2C<sup>-</sup> and CD3<sup>-</sup>CD56<sup>+</sup>NKG2C<sup>+</sup> NK cells was determined by intracellular FACS. All results are from 2 independent experiments. Paired  $t$  tests were used, and  $p$ -values of multiple group comparisons in Panel B (each group vs. IgG Isotype Ab within the NKG2C<sup>-</sup> NK cells groups and within the NKG2C<sup>+</sup> NK cells groups) were adjusted using the method of Hommel; no multiple comparison adjustment for comparing IgG Isotype Ab with the pre-culture condition.

\*  $p \leq 0.05$

Supplemental Figure 7

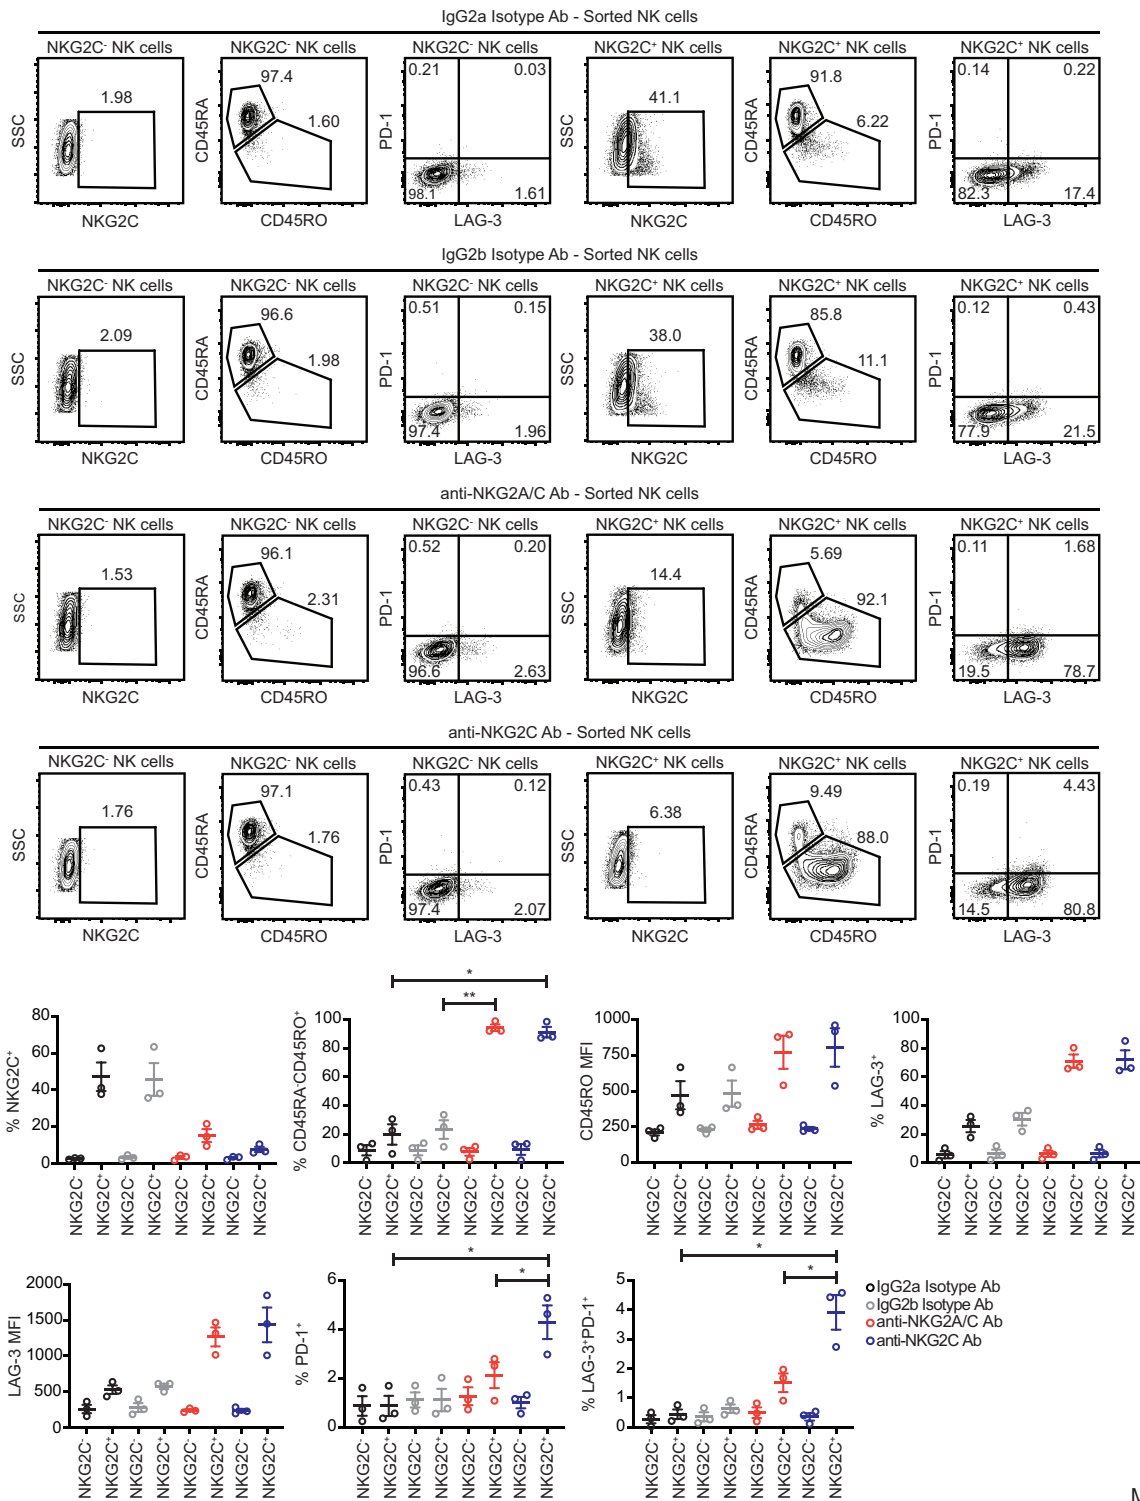

Merino et al.

**Supplemental Figure 7. Sorted NKG2C<sup>+</sup> NK cells isolated from HCMV seropositive donors downregulate NKG2C and upregulate CD45RO, LAG-3 and PD-1 in response to agonist antibody stimulation.** CD3<sup>-</sup>CD56<sup>dim</sup>NKG2C<sup>-</sup> and CD3<sup>-</sup>CD56<sup>dim</sup>NKG2C<sup>+</sup> NK cells were sorted from PBMCs isolated from HCMV seropositive donors ( $n = 3$ ) and cultured for 7 days with 10 ng/ml IL-15 and IgG2a isotype Ab, IgG2b isotype Ab, anti-NKG2A/C Ab or anti-NKG2C Ab. Shown are FACS plots of NKG2C, CD45RA, CD45RO, LAG-3 and PD-1 staining on cultured NK cells from a representative donor as well as cumulative data. Results are from 2 independent experiments. Paired  $t$  tests were used, and  $p$ -values of multiple group comparisons (3 pairwise comparisons of interest) were adjusted using the method of Hommel.  $*p \leq 0.05$ ,  $**p \leq 0.01$

Supplemental Figure 8

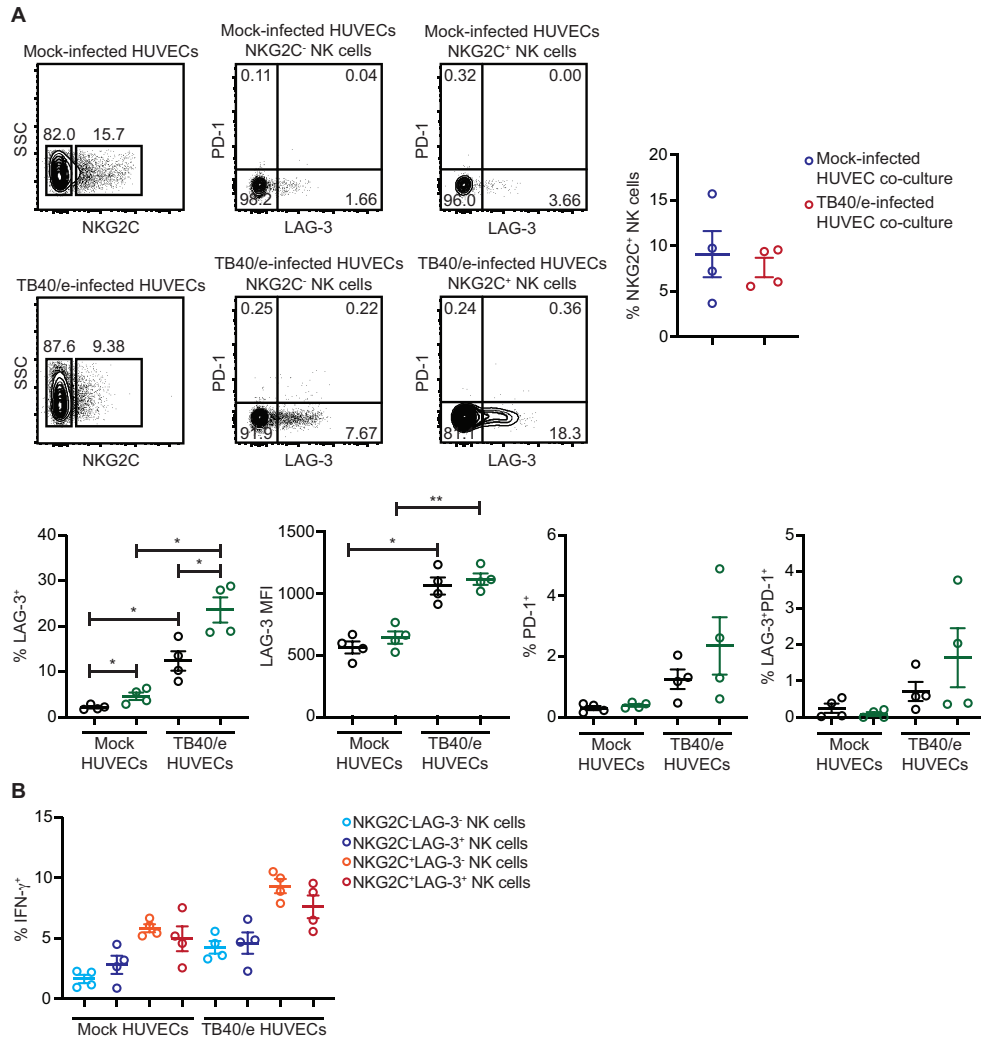

**Supplemental Figure 8. NKG2C<sup>+</sup> NK cells from HCMV seronegative donors do not upregulate LAG-3 or PD-1 to the same extent as NKG2C<sup>+</sup> NK cells from HCMV seropositive donors in response to HCMV-infected HUVECs and do not exhibit impaired IFN- $\gamma$  production.** HUVECs were infected with a GFP-expressing TB40/e clinical strain of HCMV at a MOI of 0.5 or spun down in parallel without virus (mock-infected) and used for 7-day co-culture experiments with CD3<sup>-</sup>/CD19-depleted PBMCs from HCMV seronegative donors ( $n = 4$ ). Cultures contained 10 ng/ml IL-15. (A) Representative FACS plots and summary data of the percentages of CD3<sup>-</sup>CD56<sup>+</sup>NKG2C<sup>+</sup> NK cells and LAG-3 and PD-1 expression within the CD3<sup>-</sup>CD56<sup>+</sup>NKG2C<sup>-</sup> and CD3<sup>-</sup>CD56<sup>+</sup>NKG2C<sup>+</sup> NK cell subsets from mock and TB40/e co-cultures. (B) Summary data of intracellular IFN- $\gamma$  in CD3<sup>-</sup>CD56<sup>+</sup> NK cells gated by NKG2C and LAG-3 expression from mock and TB40/e co-cultures stimulated with K562 cells at an E:T ratio of 2:1 ( $n = 4$ ). Results are from 2 independent experiments. Paired Student's  $t$  tests were used, and  $p$ -values of multiple group comparisons (Panel A: 4 pairwise comparisons as shown) were adjusted using the method of Hommel. \* $p \leq 0.05$ , \*\* $p \leq 0.01$ , \*\*\* $p \leq 0.001$
